# Supplementary material for: Higher plasma levels of lysophosphatidylcholine 18:0 are related to a lower risk of common cancers in a prospective metabolomics study
Source: PubMed Central journal article supplement (PMC4730724; doi:10.1186/s12916-016-0552-3), 2016-01-28
Supplement: 12916_2016_552_MOESM2_ESM.pdf [file 12916_2016_552_MOESM2_ESM.pdf]

## Additional File 2

### Supplementary Figures

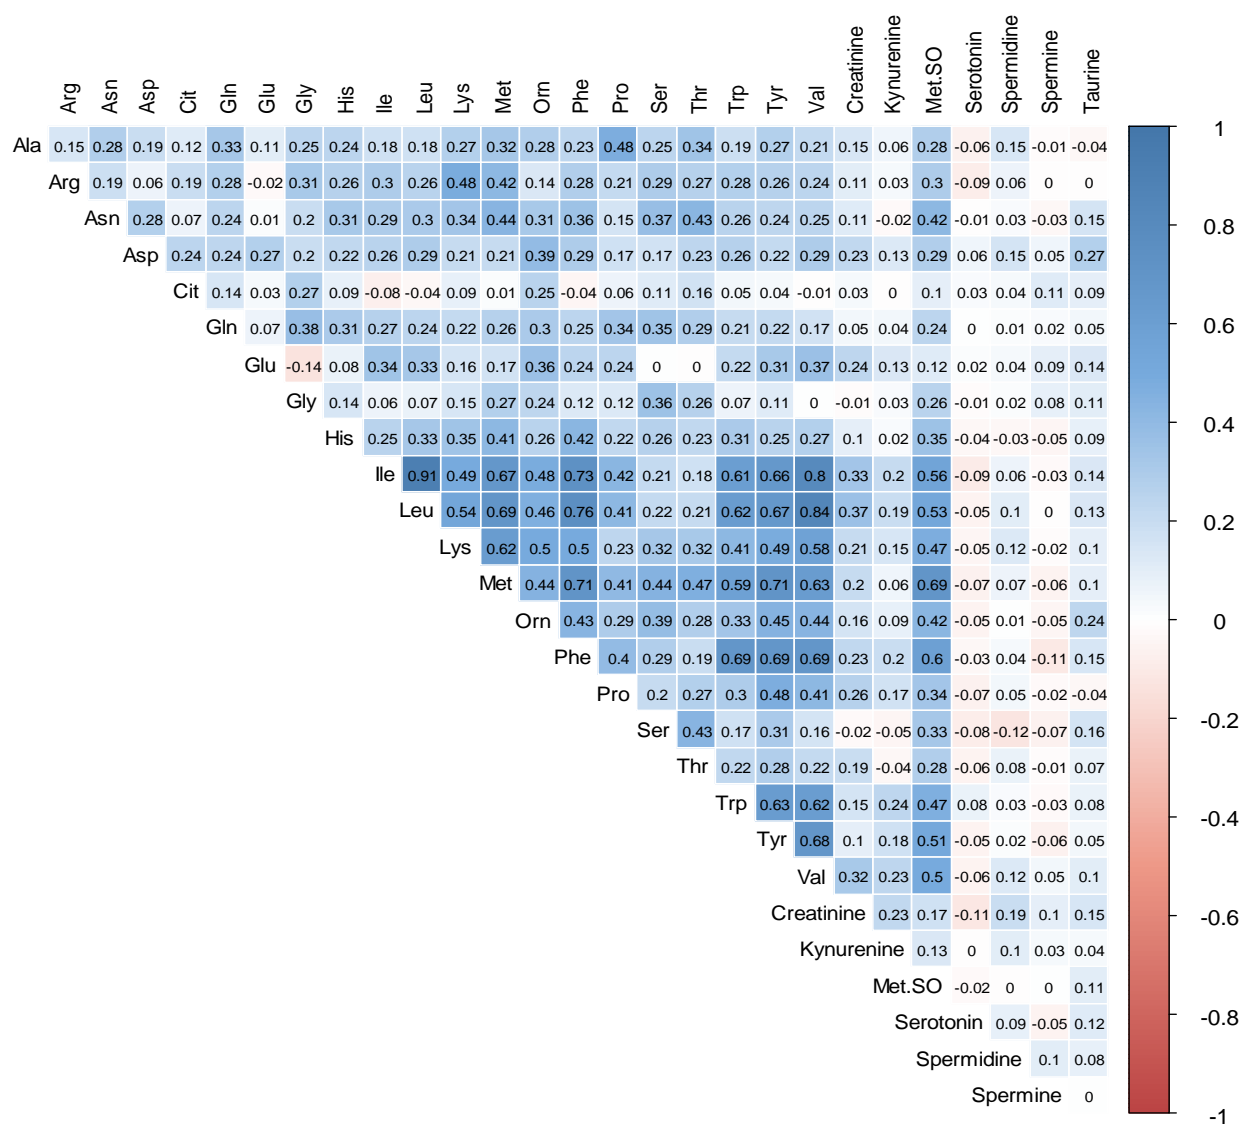

**Figure S1a** Age- and sex-adjusted Spearman's correlations between plasma metabolite levels (amino acids and biogenic amines), related to Figure 2.

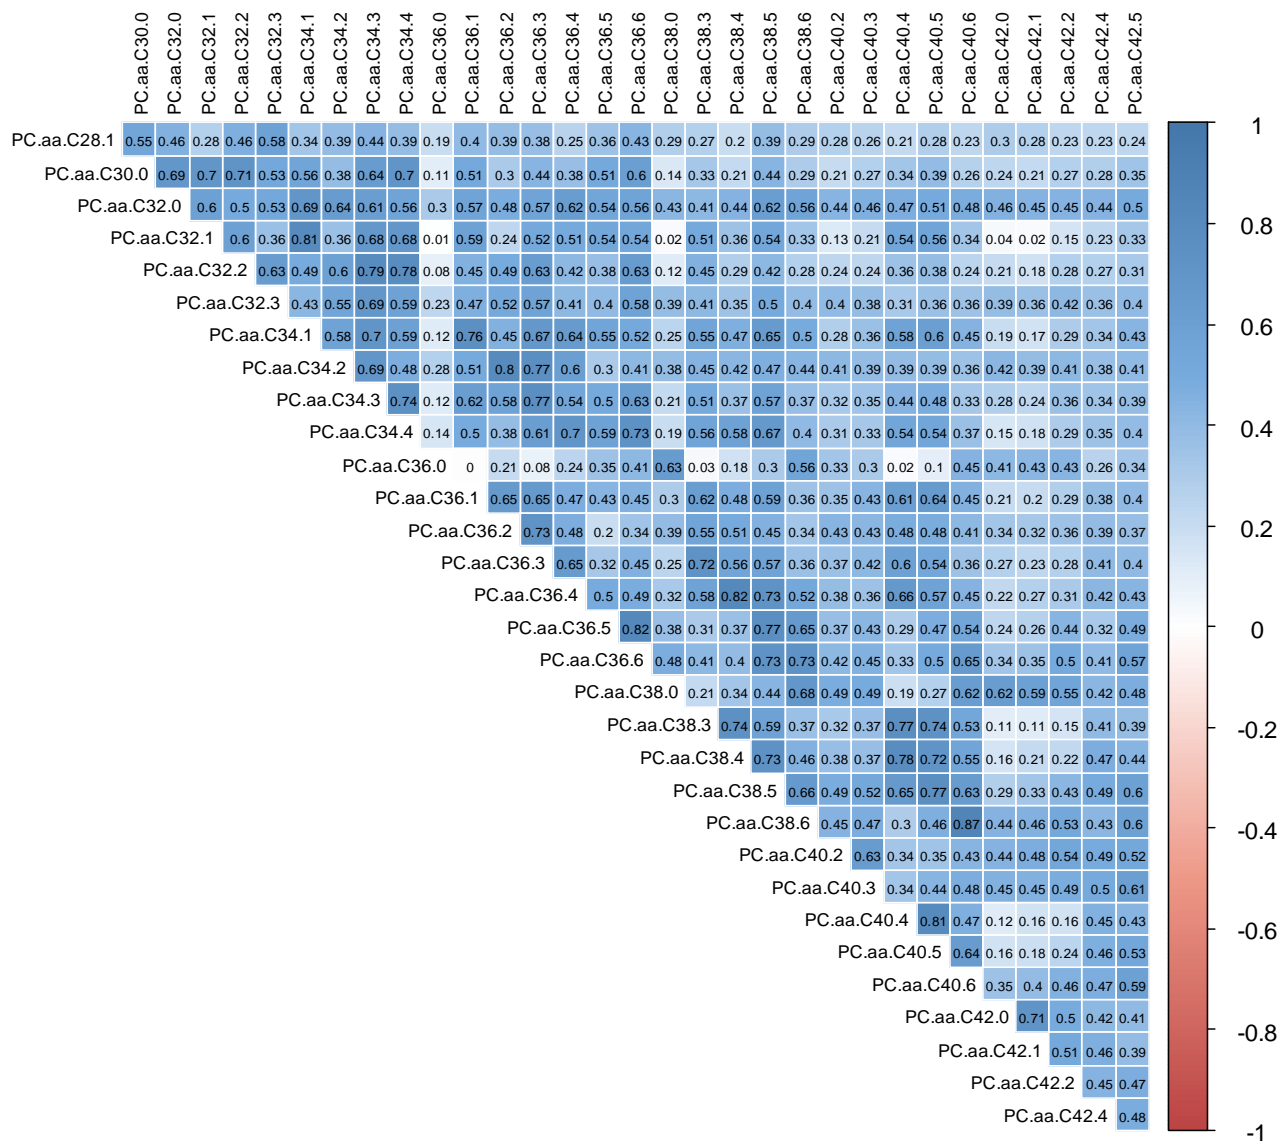

**Figure S1b** Age- and sex-adjusted Spearman's correlations between plasma metabolite levels (diacyl-phosphatidylcholines), related to Figure 2.

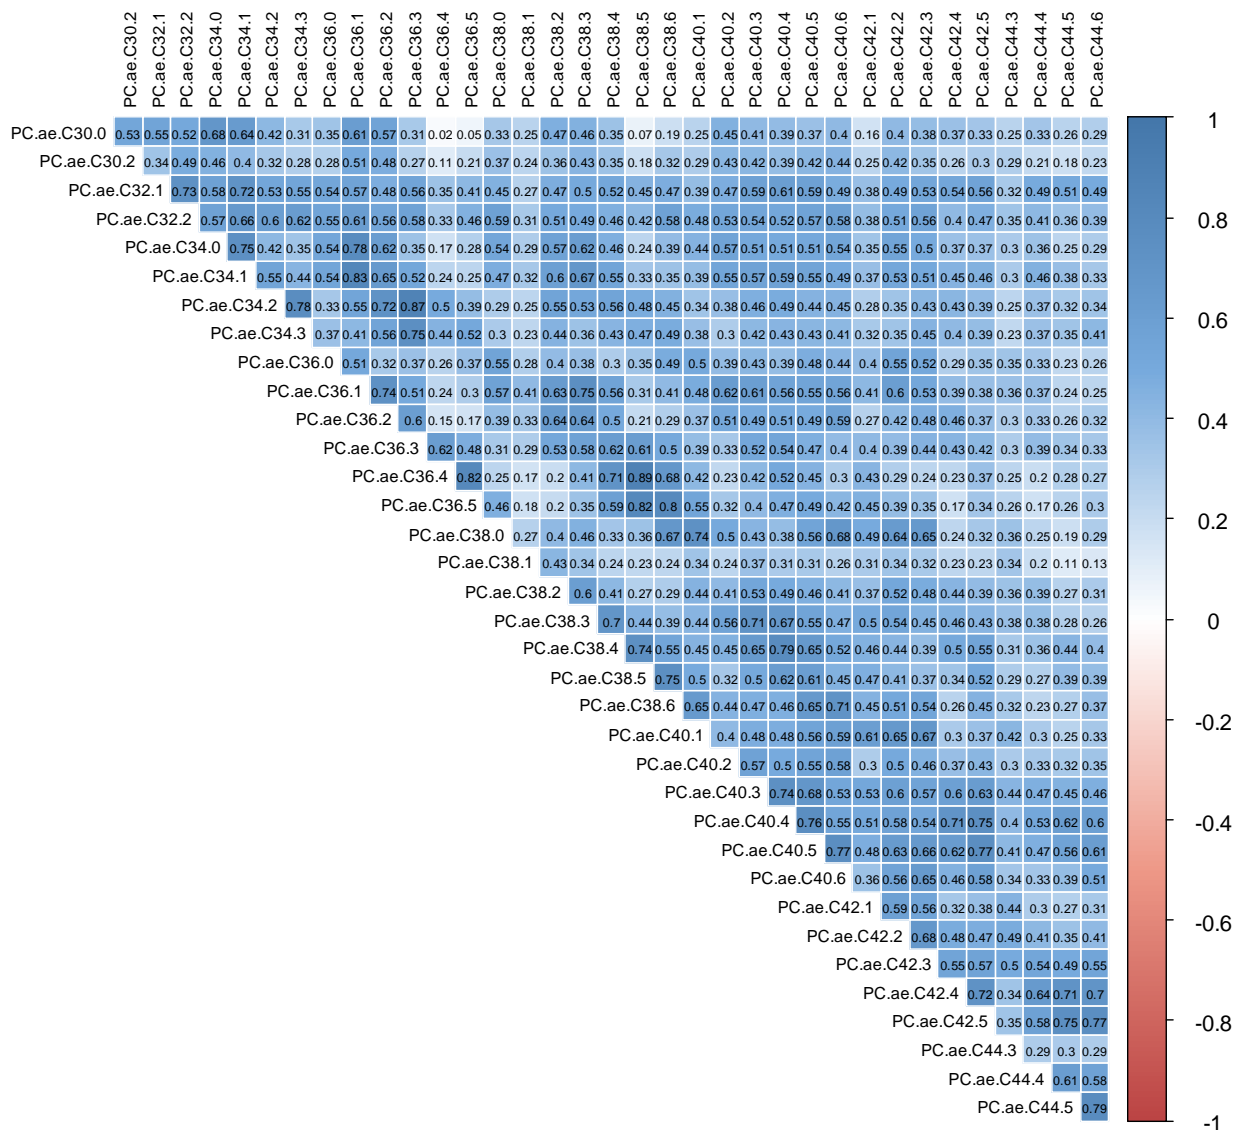

**Figure S1c** Age- and sex-adjusted Spearman's correlations between plasma metabolite levels (acyl-alkyl-phosphatidylcholines), related to Figure 2.

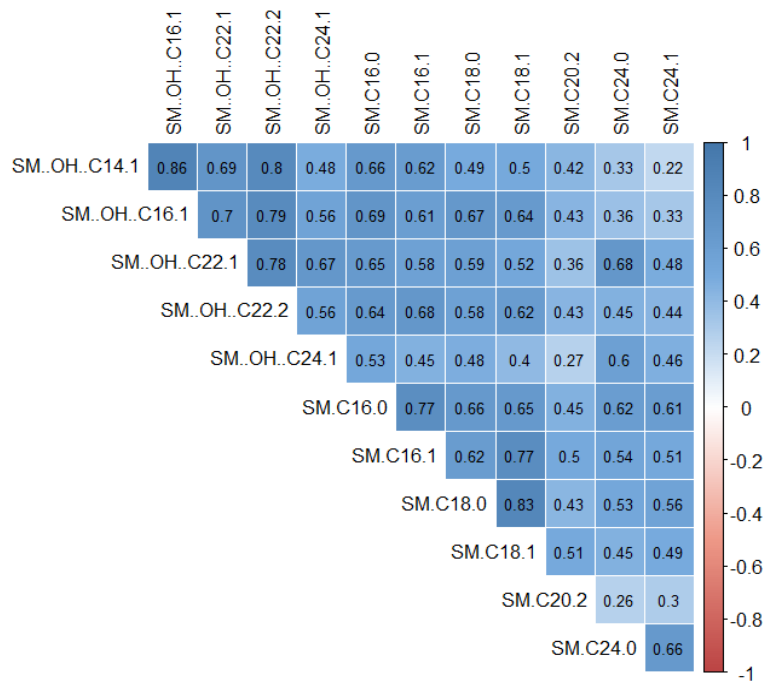

**Figure S1d** Age- and sex-adjusted Spearman's correlations between plasma metabolite levels (sphingolipids), related to Figure 2.

## Supplementary Tables

**Table S1a** Hazard ratios for overall cancer across quartiles of metabolite levels (10 strongest associations), related to Figure 1.

|                |         | Quartile1 | Quartile 2          | Quartile 3          | Quartile 4          | P trend (raw)         | P trend (corrected)   | Measured in |
|----------------|---------|-----------|---------------------|---------------------|---------------------|-----------------------|-----------------------|-------------|
| LysoPC a C18:0 | n cases | 280       | 228                 | 211                 | 116                 |                       |                       | 100 %       |
|                | median* | 14.37     | 17.93               | 20.85               | 24.63               |                       |                       |             |
|                | Ref     |           | 0.83<br>(0.61,1.12) | 0.74<br>(0.55,1.00) | 0.37<br>(0.27,0.51) | 1.10*10 <sup>-9</sup> | 1.10*10 <sup>-7</sup> |             |
| LysoPC a C18:1 | n cases | 275       | 227                 | 174                 | 159                 |                       |                       | 100 %       |
|                | median  | 10.48     | 13.01               | 15.43               | 19.15               |                       |                       |             |
|                | Ref     |           | 0.87<br>(0.64,1.18) | 0.62<br>(0.45,0.84) | 0.58<br>(0.42,0.80) | 0.00007               | 0.00792               |             |
| PC ae C30:0    | n cases | 168       | 174                 | 208                 | 253                 |                       |                       | 95.6 %      |
|                | median  | 0.3       | 0.37                | 0.44                | 0.58                |                       |                       |             |
|                | Ref     |           | 1.03<br>(0.73,1.45) | 1.41<br>(1.01,1.96) | 1.85<br>(1.31,2.60) | 0.00026               | 0.03137               |             |
| LysoPC a C20:4 | n cases | 254       | 212                 | 227                 | 142                 |                       |                       | 100 %       |
|                | median  | 3.89      | 5.16                | 6.12                | 7.88                |                       |                       |             |
|                | Ref     |           | 0.72<br>(0.53,0.97) | 0.86<br>(0.63,1.17) | 0.49<br>(0.34,0.69) | 0.00042               | 0.05038               |             |
| LysoPC a C16:0 | n cases | 253       | 206                 | 218                 | 158                 |                       |                       | 100 %       |
|                | median  | 48.74     | 58.11               | 65.69               | 77.38               |                       |                       |             |
|                | Ref     |           | 0.75<br>(0.56,1.02) | 0.95<br>(0.70,1.29) | 0.51<br>(0.37,0.71) | 0.00054               | 0.06532               |             |
| CO             | n cases | 242       | 196                 | 176                 | 204                 |                       |                       | 97.7 %      |
|                | median  | 24.01     | 28.92               | 33.12               | 39.16               |                       |                       |             |
|                | Ref     |           | 0.70<br>(0.51,0.96) | 0.60<br>(0.43,0.83) | 0.58<br>(0.42,0.81) | 0.00073               | 0.0879                |             |
| Glycine        | n cases | 273       | 198                 | 195                 | 169                 |                       |                       | 100 %       |
|                | median  | 133       | 172                 | 204                 | 260                 |                       |                       |             |
|                | Ref     |           | 0.67<br>(0.49,0.90) | 0.71<br>(0.52,0.96) | 0.56<br>(0.41,0.78) | 0.00137               | 0.1642                |             |
| PC aa C38:0    | n cases | 223       | 215                 | 204                 | 193                 |                       |                       | 100 %       |
|                | median  | 1.69      | 2.11                | 2.48                | 3.08                |                       |                       |             |
|                | Ref     |           | 1.02<br>(0.75,1.39) | 0.89<br>(0.65,1.21) | 0.71<br>(0.52,0.98) | 0.00164               | 0.1964                |             |
| Tyrosine       | n cases | 216       | 218                 | 172                 | 203                 |                       |                       | 96.9 %      |
|                | median  | 42.95     | 54.8                | 65.3                | 80.7                |                       |                       |             |
|                | Ref     |           | 0.90<br>(0.65,1.24) | 0.65<br>(0.47,0.90) | 0.71<br>(0.51,0.99) | 0.00182               | 0.2181                |             |
| LysoPC a C18:2 | n cases | 283       | 216                 | 167                 | 169                 |                       |                       | 100 %       |
|                | median  | 17.16     | 23.07               | 28.71               | 35.95               |                       |                       |             |
|                | Ref     |           | 0.79<br>(0.58,1.07) | 0.67<br>(0.48,0.93) | 0.61<br>(0.43,0.86) | 0.00331               | 0.3972                |             |

Results from Cox proportional hazards regression analyses on pre-diagnostic metabolite concentrations and cancer risk over time. All multivariable Cox regression models were adjusted for age, sex, smoking (never, former, current), lifetime alcohol intake (g/d), current aspirin use (yes/no), physical activity (Cambridge Index), waist circumference (cm), BMI (continuous), height (cm), education level (primary school, secondary school, university degree), fiber intake (g/d), processed meat intake (g/d);

\*Median metabolite concentrations in  $\mu\text{mol/L}$ ;

**Table S1b** Hazard ratios for breast cancer across quartiles of metabolite levels (10 strongest associations), related to Figure 1.

|                |         | Quartile1 | Quartile 2          | Quartile 3          | Quartile 4          | P trend (raw) | P trend (corrected) | Measured in |
|----------------|---------|-----------|---------------------|---------------------|---------------------|---------------|---------------------|-------------|
| LysoPC a C18:0 | n cases | 137       | 96                  | 84                  | 45                  |               |                     | 100 %       |
|                | median* | 13.52     | 17.34               | 20.36               | 23.23               |               |                     |             |
|                | Ref.    |           | 0.63<br>(0.41,0.97) | 0.65<br>(0.41,1.02) | 0.29<br>(0.18,0.47) | 0.00004       | 0.00421             |             |
| PC ae C38:1    | n cases | 130       | 56                  | 93                  | 77                  |               |                     | 98.1 %      |
|                | median  | 0.56      | 0.84                | 1.02                | 1.36                |               |                     |             |
|                | Ref.    |           | 0.49<br>(0.31,0.77) | 0.73<br>(0.47,1.13) | 0.53<br>(0.34,0.83) | 0.00067       | 0.08036             |             |
| PC ae C30:0    | n cases | 69        | 74                  | 92                  | 113                 |               |                     | 95.6 %      |
|                | median  | 0.33      | 0.4                 | 0.47                | 0.6                 |               |                     |             |
|                | Ref.    |           | 1.08<br>(0.67,1.75) | 1.45<br>(0.88,2.37) | 1.97<br>(1.20,3.23) | 0.00522       | 0.62608             |             |
| CO             | n cases | 100       | 107                 | 71                  | 71                  |               |                     | 97.7 %      |
|                | median  | 21.79     | 26.48               | 30.46               | 36.66               |               |                     |             |
|                | Ref.    |           | 0.96<br>(0.62,1.50) | 0.62<br>(0.38,1.01) | 0.54<br>(0.33,0.89) | 0.00538       | 0.6458              |             |
| Kynurenine     | n cases | 49        | 65                  | 63                  | 104                 |               |                     | 77.6 %      |
|                | median  | 1.98      | 2.5                 | 2.58                | 3.52                |               |                     |             |
|                | Ref.    |           | 1.27<br>(0.74,2.18) | 1.13<br>(0.64,2.01) | 1.97<br>(1.17,3.33) | 0.00889       | 1                   |             |
| PC aa C38:4    | n cases | 109       | 94                  | 91                  | 68                  |               |                     | 100 %       |
|                | median  | 64.73     | 82.08               | 98.84               | 118.16              |               |                     |             |
|                | Ref.    |           | 0.92<br>(0.60,1.41) | 0.81<br>(0.52,1.26) | 0.54<br>(0.33,0.88) | 0.00991       | 1                   |             |
| Tyrosine       | n cases | 112       | 88                  | 79                  | 72                  |               |                     | 96.9 %      |
|                | median  | 40.8      | 53.05               | 62.4                | 82.2                |               |                     |             |
|                | Ref.    |           | 0.76<br>(0.48,1.22) | 0.54<br>(0.34,0.88) | 0.57<br>(0.35,0.93) | 0.0119        | 1                   |             |
| PC ae C40:4    | n cases | 123       | 87                  | 87                  | 65                  |               |                     | 100 %       |
|                | median  | 1.59      | 1.87                | 2.14                | 2.62                |               |                     |             |
|                | Ref.    |           | 0.70<br>(0.45,1.08) | 0.60<br>(0.38,0.94) | 0.47<br>(0.29,0.76) | 0.01415       | 1                   |             |
| Spermidine     | n cases | 94        | 76                  | 74                  | 62                  |               |                     | 85.3 %      |
|                | median  | 1.08      | 1.04                | 1.08                | 1.15                |               |                     |             |
|                | Ref.    |           | 0.79<br>(0.49,1.28) | 0.71<br>(0.43,1.16) | 0.61<br>(0.38,0.98) | 0.01592       | 1                   |             |
| PC ae C38:6    | n cases | 107       | 93                  | 91                  | 71                  |               |                     | 100 %       |
|                | median  | 4.55      | 5.55                | 6.16                | 7.89                |               |                     |             |
|                | Ref.    |           | 0.75<br>(0.48,1.19) | 0.87<br>(0.54,1.38) | 0.56<br>(0.35,0.89) | 0.01692       | 1                   |             |

Results from Cox proportional hazards regression analyses on pre-diagnostic metabolite concentrations and cancer risk over time. Cox regression models were adjusted for age, smoking (never, former, current), lifetime alcohol intake (g/d), current aspirin use (yes/no), physical activity (Cambridge Index), waist circumference (cm), BMI (continuous), height (cm), education level (primary school, secondary school, university degree), menopausal status, current HRT use (yes/no), current oral contraceptive use (yes/no), at least one full term pregnancy (yes/no);

\*Median metabolite concentrations in  $\mu\text{mol/L}$ ;

**Table S1c** Hazard ratios for prostate cancer across quartiles of metabolite levels (10 strongest associations), related to Figure 1.

|                |         | Quartile1 | Quartile 2          | Quartile 3          | Quartile 4          | P trend (raw) | P trend (corrected) | Measured in |
|----------------|---------|-----------|---------------------|---------------------|---------------------|---------------|---------------------|-------------|
| PC ae C30:0    | n cases | 64        | 63                  | 71                  | 100                 |               |                     | 95.6 %      |
|                | median* | 0.28      | 0.35                | 0.4                 | 0.53                |               |                     |             |
|                | Ref.    |           | 0.89<br>(0.50,1.58) | 1.38<br>(0.78,2.44) | 1.89<br>(1.06,3.36) | 0.00194       | 0.2328              |             |
| Alanine        | n cases | 57        | 62                  | 94                  | 97                  |               |                     | 99.9 %      |
|                | median  | 251       | 313                 | 364.5               | 450                 |               |                     |             |
|                | Ref.    |           | 0.96<br>(0.54,1.71) | 1.45<br>(0.84,2.50) | 1.66<br>(0.98,2.81) | 0.00276       | 0.3318              |             |
| LysoPC a C16:1 | n cases | 95        | 81                  | 68                  | 66                  |               |                     | 100 %       |
|                | median  | 1.43      | 1.79                | 2.19                | 2.78                |               |                     |             |
|                | Ref.    |           | 0.93<br>(0.55,1.59) | 0.62<br>(0.36,1.04) | 0.70<br>(0.41,1.18) | 0.00706       | 0.8471              |             |
| LysoPC a C18:0 | n cases | 93        | 96                  | 73                  | 48                  |               |                     | 100 %       |
|                | median  | 15.33     | 18.69               | 21.43               | 26.3                |               |                     |             |
|                | Ref.    |           | 1.31<br>(0.75,2.28) | 0.79<br>(0.45,1.39) | 0.57<br>(0.33,0.98) | 0.01388       | 1                   |             |
| LysoPC a C18:1 | n cases | 116       | 79                  | 62                  | 53                  |               |                     | 100 %       |
|                | median  | 11.65     | 13.88               | 15.95               | 19.86               |               |                     |             |
|                | Ref.    |           | 0.83<br>(0.50,1.37) | 0.64<br>(0.38,1.07) | 0.48<br>(0.28,0.82) | 0.1717        | 1                   |             |
| Met-SO         | n cases | 43        | 77                  | 88                  | 94                  |               |                     | 97.0 %      |
|                | median  | 1.6       | 1.71                | 1.84                | 2.35                |               |                     |             |
|                | Ref.    |           | 1.42<br>(0.79,2.55) | 2.44<br>(1.32,4.48) | 1.71<br>(0.95,3.08) | 0.02291       | 1                   |             |
| Proline        | n cases | 62        | 88                  | 78                  | 82                  |               |                     | 100 %       |
|                | median  | 128,5     | 171                 | 207,5               | 260                 |               |                     |             |
|                | Ref.    |           | 1.43<br>(0.82,2.51) | 1.29<br>(0.74,2.25) | 1.94<br>(1.11,3.40) | 0.02955       | 1                   |             |
| PC aa C38:0    | n cases | 85        | 80                  | 70                  | 75                  |               |                     | 100 %       |
|                | median  | 1.65      | 2.03                | 2.38                | 2.93                |               |                     |             |
|                | Ref.    |           | 1.02<br>(0.61,1.70) | 0.64<br>(0.38,1.08) | 0.74<br>(0.43,1.26) | 0.07045       | 1                   |             |
| Kynurenine     | n cases | 59        | 51                  | 59                  | 80                  |               |                     | 77.6 %      |
|                | median  | 2.18      | 2.43                | 2.84                | 3.59                |               |                     |             |
|                | Ref.    |           | 1.31<br>(0.68,2.53) | 1.24<br>(0.66,2.36) | 1.63<br>(0.88,3.02) | 0.08071       | 1                   |             |
| LysoPC a C16:0 | n cases | 88        | 85                  | 92                  | 45                  |               |                     | 100 %       |
|                | median  | 53.14     | 60.34               | 69.86               | 84.45               |               |                     |             |
|                | Ref.    |           | 1.01<br>(0.61,1.69) | 1.31<br>(0.76,2.24) | 0.46<br>(0.26,0.81) | 0.09339       | 1                   |             |

Results from Cox proportional hazards regression analyses on pre-diagnostic metabolite concentrations and cancer risk over time. Cox regression models were adjusted for age, smoking (never, former, current), lifetime alcohol intake (g/d), current aspirin use (yes/no), physical activity (Cambridge Index), waist circumference (cm), BMI (continuous), height (cm), education level (primary school, secondary school, university degree);

\*Median metabolite concentrations in  $\mu\text{mol/L}$ ;

**Table S1d** Hazard ratios for colorectal cancer across quartiles of metabolite levels (10 strongest associations), related to Figure 1.

|                |         | Quartile1 | Quartile 2          | Quartile 3          | Quartile 4          | P trend (raw) | P trend (corrected) | Measured in |
|----------------|---------|-----------|---------------------|---------------------|---------------------|---------------|---------------------|-------------|
| LysoPC a C18:0 | n cases | 47        | 47                  | 46                  | 23                  |               |                     | 100 %       |
|                | median* | 14.37     | 17.71               | 21.21               | 24.13               |               |                     |             |
|                | Ref     |           | 1.16<br>(0.67,2.01) | 1.06<br>(0.62,1.82) | 0.50<br>(0.28,0.90) | 0.00196       | 0.2348              |             |
| LysoPC a C18:2 | n cases | 67        | 38                  | 34                  | 24                  |               |                     | 100 %       |
|                | median  | 16.64     | 22.78               | 28.16               | 36.32               |               |                     |             |
|                | Ref     |           | 0.61<br>(0.37,1.02) | 0.64<br>(0.36,1.13) | 0.42<br>(0.23,0.78) | 0.00503       | 0.6031              |             |
| LysoPC a C18:1 | n cases | 54        | 43                  | 36                  | 30                  |               |                     | 100 %       |
|                | median  | 10.43     | 13.11               | 15.29               | 19.26               |               |                     |             |
|                | Ref     |           | 0.99<br>(0.59,1.67) | 0.78<br>(0.46,1.33) | 0.58<br>(0.33,1.02) | 0.0092        | 1                   |             |
| PC ae C30:0    | n cases | 36        | 36                  | 46                  | 39                  |               |                     | 95.6 %      |
|                | median  | 0.28      | 0.38                | 0.45                | 0.59                |               |                     |             |
|                | Ref     |           | 1.00<br>(0.54,1.83) | 1.79<br>(1.01,3.18) | 1.84<br>(1.02,3.34) | 0.01069       | 1                   |             |
| Serine         | n cases | 56        | 43                  | 45                  | 19                  |               |                     | 100 %       |
|                | median  | 62.25     | 85.1                | 102                 | 120                 |               |                     |             |
|                | Ref     |           | 0.77<br>(0.48,1.26) | 0.78<br>(0.48,1.28) | 0.42<br>(0.22,0.78) | 0.01264       | 1                   |             |
| PC aa C32:1    | n cases | 25        | 29                  | 48                  | 61                  |               |                     | 100 %       |
|                | median  | 10.02     | 14.33               | 18.49               | 34.43               |               |                     |             |
|                | Ref     |           | 1.03<br>(0.54,1.97) | 1.76<br>(0.98,3.17) | 1.71<br>(0.95,3.08) | 0.02308       | 1                   |             |
| Glycine        | n cases | 61        | 39                  | 38                  | 25                  |               |                     | 100 %       |
|                | median  | 134       | 169                 | 209                 | 253                 |               |                     |             |
|                | Ref     |           | 0.61<br>(0.37,1.00) | 0.68<br>(0.41,1.12) | 0.46<br>(0.26,0.82) | 0.02929       | 1                   |             |
| PC ae C34:1    | n cases | 35        | 39                  | 44                  | 45                  |               |                     | 100 %       |
|                | median  | 6.39      | 8.07                | 9.05                | 11.25               |               |                     |             |
|                | Ref     |           | 1.38<br>(0.79,2.40) | 1.80<br>(1.02,3.17) | 1.65<br>(0.92,2.97) | 0.04893       | 1                   |             |
| PC aa C36:5    | n cases | 28        | 35                  | 49                  | 51                  |               |                     | 100 %       |
|                | median  | 14.27     | 18.68               | 25.69               | 40.74               |               |                     |             |
|                | Ref     |           | 1.26<br>(0.69,2.29) | 1.51<br>(0.86,2.66) | 1.53<br>(0.87,2.72) | 0.05039       | 1                   |             |
| PC ae C38:4    | n cases | 31        | 55                  | 36                  | 41                  |               |                     | 100 %       |
|                | median  | 8.62      | 10.13               | 11.62               | 14.21               |               |                     |             |
|                | Ref     |           | 1.80<br>(1.07,3.01) | 1.45<br>(0.83,2.53) | 1.34<br>(0.78,2.30) | 0.05299       | 1                   |             |

Results from Cox proportional hazards regression analyses on pre-diagnostic metabolite concentrations and cancer risk over time. All multivariable Cox regression models were adjusted for age, sex, smoking (never, former, current), lifetime alcohol intake (g/d), current aspirin use (yes/no), physical activity (Cambridge Index), waist circumference (cm), BMI (continuous), height (cm), education level (primary school, secondary school, university degree), fiber intake (g/d), processed meat intake (g/d);

\*Median metabolite concentrations in  $\mu\text{mol/L}$ ;



**Table S2a** Hazard ratios of cancer across quartiles of LysoPC a C18:0 levels stratified by median lag time, related to Table 2.

|                       |         | Quartile 1 | Quartile 2          | Quartile 3          | Quartile 4          | P trend (raw)         | P trend (corr.)       | P heterogeneity |
|-----------------------|---------|------------|---------------------|---------------------|---------------------|-----------------------|-----------------------|-----------------|
| <b>Overall Cancer</b> |         |            |                     |                     |                     |                       |                       | 0.5534          |
| Lag time <6.48y       | n cases | 150        | 113                 | 97                  | 57                  |                       |                       |                 |
|                       | Ref     |            | 0.76<br>(0.53,1.09) | 0.69<br>(0.48,0.98) | 0.36<br>(0.24,0.54) | 4.65*10 <sup>-8</sup> | 5.58*10 <sup>-6</sup> |                 |
| Lag time ≥6.48y       | n cases | 130        | 115                 | 114                 | 59                  |                       |                       |                 |
|                       | Ref     |            | 1.05<br>(0.71,1.57) | 0.87<br>(0.58,1.28) | 0.40<br>(0.26,0.62) | 1.06*10 <sup>-5</sup> | 0.00127               |                 |
| <b>Breast Cancer</b>  |         |            |                     |                     |                     |                       |                       | 0.6460          |
| Lag time <6.36y       | n cases | 77         | 41                  | 38                  | 26                  |                       |                       |                 |
|                       | Ref     |            | 0.44<br>(0.25,0.79) | 0.52<br>(0.29,0.91) | 0.29<br>(0.16,0.52) | 0.00015               | 0.0176                |                 |
| Lag time ≥6.36y       | n cases | 60         | 55                  | 46                  | 19                  |                       |                       |                 |
|                       | Ref     |            | 0.77<br>(0.45,1.31) | 0.75<br>(0.42,1.33) | 0.24<br>(0.12,0.47) | 0.00097               | 0.1161                |                 |
| <b>Prostate Ca.</b>   |         |            |                     |                     |                     |                       |                       | 0.4921          |
| Lag time <6.83y       | n cases | 44         | 52                  | 39                  | 20                  |                       |                       |                 |
|                       | Ref     |            | 1.41<br>(0.72,2.77) | 1.05<br>(0.52,2.10) | 0.57<br>(0.28,1.16) | 0.07301               | 1                     |                 |
| Lag time ≥6.83y       | n cases | 49         | 44                  | 34                  | 28                  |                       |                       |                 |
|                       | Ref     |            | 1.11<br>(0.55,2.21) | 0.47<br>(0.23,0.93) | 0.49<br>(0.24,1.00) | 0.00953               | 1                     |                 |
| <b>Colorectal Ca.</b> |         |            |                     |                     |                     |                       |                       | 0.0119          |
| Lag time <6.57y       | n cases | 27         | 25                  | 17                  | 12                  |                       |                       |                 |
|                       | Ref     |            | 0.94<br>(0.50,1.77) | 0.65<br>(0.33,1.29) | 0.39<br>(0.18,0.82) | 0.00037               | 0.04427               |                 |
| Lag time ≥6.57y       | n cases | 20         | 22                  | 29                  | 11                  |                       |                       |                 |
|                       | Ref     |            | 1.81<br>(0.83,3.95) | 2.51<br>(1.29,4.85) | 0.88<br>(0.38,1.99) | 0.7794                | 1                     |                 |

Results from Cox proportional hazards regression analyses on pre-diagnostic metabolite concentrations and cancer risk over time.

Cox regression analyses were adjusted for the following factors:

Overall cancer: Age, sex, height (cm), waist (cm), smoking (never, former, current), lifetime alcohol intake (g/d), current aspirin use (yes/no), physical activity (Cambridge Index), education level (primary school, secondary school, university degree), fiber intake (g/d), processed meat intake (g/d);

Breast cancer: Age, height (cm), waist (cm), smoking (never, former, current), lifetime alcohol intake (g/d), physical activity (Cambridge Index), education level (primary school, secondary school, university degree), menopausal status, current HRT use (yes/no), current oral contraceptive use (yes/no), at least one full term pregnancy (yes/no);

Colon cancer: Age, sex, waist (cm), smoking (never, former, current), lifetime alcohol intake (g/d);

Prostate cancer: Age, height (cm), waist (cm), physical activity (Cambridge Index), smoking (never, former, current), lifetime alcohol intake (g/d), education level (primary school, secondary school, university degree);

**Table S2b** Hazard ratios for cancer across quartiles of PC ae C30:0 levels stratified by median lag time, related to Table 2.

|                       |         | Quartile 1 | Quartile 2          | Quartile 3          | Quartile 4          | P trend<br>(raw) | P trend<br>(corr.) | P hetero-<br>geneity |
|-----------------------|---------|------------|---------------------|---------------------|---------------------|------------------|--------------------|----------------------|
| <b>Overall Cancer</b> |         |            |                     |                     |                     |                  |                    | 0.7256               |
| Lag time <6.48y       | n cases | 90         | 71                  | 108                 | 129                 |                  |                    |                      |
|                       |         | Ref        | 0.75<br>(0.49,1.15) | 1.37<br>(0.92,2.06) | 1.70<br>(1.13,2.55) | 0.00106          | 0.1269             |                      |
| Lag time ≥6.48y       | n cases | 78         | 103                 | 100                 | 124                 |                  |                    |                      |
|                       |         | Ref        | 1.71<br>(1.10,2.66) | 1.91<br>(1.22,3.00) | 2.62<br>(1.64,4.19) | 0.00051          | 0.0607             |                      |
| <b>Breast Cancer</b>  |         |            |                     |                     |                     |                  |                    | 0.8907               |
| Lag time <6.36y       | n cases | 33         | 33                  | 49                  | 59                  |                  |                    |                      |
|                       |         | Ref        | 0.95<br>(0.51,1.76) | 1.41<br>(0.74,2.71) | 2.01<br>(1.07,3.76) | 0.01414          | 1                  |                      |
| Lag time ≥6.36y       | n cases | 36         | 41                  | 43                  | 54                  |                  |                    |                      |
|                       |         | Ref        | 1.30<br>(0.69,2.44) | 1.52<br>(0.80,2.90) | 1.99<br>(1.01,3.91) | 0.03792          | 1                  |                      |
| <b>Prostate Ca.</b>   |         |            |                     |                     |                     |                  |                    | 0.7736               |
| Lag time <6.83y       | n cases | 36         | 25                  | 38                  | 50                  |                  |                    |                      |
|                       |         | Ref        | 0.55<br>(0.26,1.15) | 1.39<br>(0.68,2.85) | 1.85<br>(0.91,3.73) | 0.0045           | 0.5399             |                      |
| Lag time ≥6.83y       | n cases | 28         | 38                  | 33                  | 50                  |                  |                    |                      |
|                       |         | Ref        | 1.35<br>(0.68,2.70) | 1.35<br>(0.64,2.87) | 1.91<br>(0.92,3.98) | 0.01628          | 1                  |                      |
| <b>Colorectal Ca.</b> |         |            |                     |                     |                     |                  |                    | 0.3988               |
| Lag time <6.57y       | n cases | 19         | 16                  | 24                  | 17                  |                  |                    |                      |
|                       |         | Ref        | 0.89<br>(0.42,1.90) | 1.68<br>(0.86,3.29) | 1.34<br>(0.65,2.75) | 0.1649           | 1                  |                      |
| Lag time ≥6.57y       | n cases | 17         | 20                  | 22                  | 22                  |                  |                    |                      |
|                       |         | Ref        | 1.65<br>(0.75,3.62) | 2.60<br>(1.13,5.95) | 2.54<br>(1.09,5.92) | 0.01935          | 1                  |                      |

Results from Cox proportional hazards regression analyses on pre-diagnostic metabolite concentrations and cancer risk over time. Cox regression analyses were adjusted for the following factors:

Overall cancer: Age, sex, height (cm), waist (cm), smoking (never, former, current), lifetime alcohol intake (g/d), current aspirin use (yes/no), physical activity (Cambridge Index), education level (primary school, secondary school, university degree), fiber intake (g/d), processed meat intake (g/d);

Breast cancer: Age, height (cm), waist (cm), smoking (never, former, current), lifetime alcohol intake (g/d), physical activity (Cambridge Index), education level (primary school, secondary school, university degree), menopausal status, current HRT use (yes/no), current oral contraceptive use (yes/no), at least one full term pregnancy (yes/no);

Colon cancer: Age, sex, waist (cm), smoking (never, former, current), lifetime alcohol intake (g/d);

Prostate cancer: Age, height (cm), waist (cm), physical activity (Cambridge Index), smoking (never, former, current), lifetime alcohol intake (g/d), education level (primary school, secondary school, university degree);

**Table S2c** Hazard ratios for cancer across quartiles of metabolite levels after exclusion of cases from the first two years of follow-up, related to Table 2.

|                        |         | Quartile 1 | Quartile 2          | Quartile 3          | Quartile 4          | P trend (raw)         | P trend (corr.)       |
|------------------------|---------|------------|---------------------|---------------------|---------------------|-----------------------|-----------------------|
| <b>Overall cancer</b>  |         |            |                     |                     |                     |                       |                       |
| LysoPC a C18:0         | n cases | 242        | 199                 | 188                 | 100                 |                       |                       |
|                        | Ref     |            | 0.85<br>(0.62,1.16) | 0.75<br>(0.55,1.02) | 0.36<br>(0.25,0.50) | 1.01*10 <sup>-9</sup> | 1.21*10 <sup>-7</sup> |
| PC ae C30:0            | n cases | 147        | 156                 | 181                 | 218                 |                       |                       |
|                        | Ref     |            | 1.11<br>(0.78,1.57) | 1.45<br>(1.03,2.05) | 1.91<br>(1.34,2.73) | 0.00051               | 0.06140               |
| <b>Breast cancer</b>   |         |            |                     |                     |                     |                       |                       |
| LysoPC a C18:0         | n cases | 115        | 88                  | 71                  | 34                  |                       |                       |
|                        | Ref     |            | 0.68<br>(0.44,1.06) | 0.64<br>(0.40,1.02) | 0.25<br>(0.15,0.42) | 0.00002               | 0.00187               |
| PC ae C30:0            | n cases | 60         | 65                  | 79                  | 92                  |                       |                       |
|                        | Ref     |            | 1.11<br>(0.67,1.83) | 1.46<br>(0.88,2.42) | 1.86<br>(1.11,3.10) | 0.02463               | 1                     |
| <b>Prostate cancer</b> |         |            |                     |                     |                     |                       |                       |
| LysoPC a C18:0         | n cases | 81         | 86                  | 68                  | 45                  |                       |                       |
|                        | Ref     |            | 1.42<br>(0.81,2.47) | 0.81<br>(0.46,1.43) | 0.59<br>(0.34,1.04) | 0.01265               | 1                     |
| PC ae C30:0            | n cases | 55         | 59                  | 65                  | 90                  |                       |                       |
|                        | Ref     |            | 0.99<br>(0.55,1.79) | 1.51<br>(0.85,2.68) | 2.01<br>(1.12,3.60) | 0.00139               | 0.1669                |
| <b>Colon cancer</b>    |         |            |                     |                     |                     |                       |                       |
| LysoPC a C18:0         | n cases | 39         | 41                  | 41                  | 20                  |                       |                       |
|                        | Ref     |            | 1.30<br>(0.71,2.35) | 1.20<br>(0.67,2.15) | 0.55<br>(0.29,1.04) | 0.01685               | 1                     |
| PC ae C30:0            | n cases | 30         | 34                  | 36                  | 37                  |                       |                       |
|                        | Ref     |            | 1.20<br>(0.64,2.28) | 1.71<br>(0.90,3.26) | 2.21<br>(1.17,4.17) | 0.00494               | 0.5925                |

Results from Cox proportional hazards regression analyses on pre-diagnostic metabolite concentrations and cancer risk over time. Cox regression analyses were adjusted for the following factors:

Overall cancer: Age, sex, height (cm), waist (cm), smoking (never, former, current), lifetime alcohol intake (g/d), current aspirin use (yes/no), physical activity (Cambridge Index), education level (primary school, secondary school, university degree), fiber intake (g/d), processed meat intake (g/d);

Breast cancer: Age, height (cm), waist (cm), smoking (never, former, current), lifetime alcohol intake (g/d), physical activity (Cambridge Index), education level (primary school, secondary school, university degree), menopausal status, current HRT use (yes/no), current oral contraceptive use (yes/no), at least one full term pregnancy (yes/no);

Colon cancer: Age, sex, waist (cm), smoking (never, former, current), lifetime alcohol intake (g/d);

Prostate cancer: Age, height (cm), waist (cm), physical activity (Cambridge Index), smoking (never, former, current), lifetime alcohol intake (g/d), education level (primary school, secondary school, university degree);
